# Supplementary material for: Childhood and adolescence factors and multiple sclerosis: results from the German National Cohort (NAKO)
Source: PubMed Central journal article supplement (PMC11015562; doi:10.1186/s12883-024-03620-4), 2024-04-13
Supplement: 12883_2024_3620_MOESM1_ESM.pdf [file 12883_2024_3620_MOESM1_ESM.pdf]

Supplementary Table S1: Multivariable Cox proportional hazards regression on the association between childhood and adolescence factors and multiple sclerosis stratified by sex (n<sub>women</sub> = 103073; n<sub>men</sub> = 101200)

| Variable                                                         | Multivariable Cox proportional Hazards Model <sup>a</sup> |                     |                 |                     |
|------------------------------------------------------------------|-----------------------------------------------------------|---------------------|-----------------|---------------------|
|                                                                  | Women                                                     |                     | Men             |                     |
|                                                                  | HR <sup>b</sup>                                           | 95% CI <sup>b</sup> | HR <sup>b</sup> | 95% CI <sup>b</sup> |
| <b>Number of siblings</b>                                        |                                                           |                     |                 |                     |
| Only child                                                       | <i>Ref.</i>                                               |                     | <i>Ref.</i>     |                     |
| 1-2 sibling(s)                                                   | 0.94                                                      | 0.75 – 1.19         | 1.03            | 0.72 – 1.47         |
| ≥3 siblings                                                      | 1.00                                                      | 0.74 – 1.34         | 0.87            | 0.55 – 1.37         |
| <b>Premature birth (&gt;4 weeks before due date)</b>             |                                                           |                     |                 |                     |
| No                                                               | <i>Ref.</i>                                               |                     | <i>Ref.</i>     |                     |
| Yes                                                              | 0.86                                                      | 0.49 – 1.51         | 1.12            | 0.55 – 2.27         |
| <b>Cesarean section</b>                                          |                                                           |                     |                 |                     |
| No                                                               | <i>Ref.</i>                                               |                     | <i>Ref.</i>     |                     |
| Yes                                                              | 1.07                                                      | 0.70 – 1.65         | 1.14            | 0.67 – 1.92         |
| <b>Birth weight</b>                                              |                                                           |                     |                 |                     |
| Low                                                              | 1.04                                                      | 0.72 – 1.48         | 1.08            | 0.60 – 1.93         |
| Average                                                          | <i>Ref.</i>                                               |                     | <i>Ref.</i>     |                     |
| High                                                             | 1.02                                                      | 0.72 – 1.44         | 1.28            | 0.89 – 1.83         |
| <b>Ever breastfed</b>                                            |                                                           |                     |                 |                     |
| No                                                               | <i>Ref.</i>                                               |                     | <i>Ref.</i>     |                     |
| Yes, ≤4 months                                                   | 1.21                                                      | 0.96 – 1.51         | 0.59            | 0.40 – 0.86         |
| Yes, >4 months                                                   | 0.85                                                      | 0.65 – 1.09         | 0.70            | 0.48 – 1.03         |
| <b>Contact with pets and/or livestock during childhood</b>       |                                                           |                     |                 |                     |
| No                                                               | <i>Ref.</i>                                               |                     | <i>Ref.</i>     |                     |
| Yes                                                              | 1.00                                                      | 0.70 – 1.41         | 1.23            | 0.79 – 1.93         |
| <b>Attended daycare</b>                                          |                                                           |                     |                 |                     |
| No                                                               | <i>Ref.</i>                                               |                     | <i>Ref.</i>     |                     |
| Yes, 1 <sup>st</sup> attendance at age 3-6 years                 | 0.81                                                      | 0.64 – 1.03         | 1.17            | 0.84 – 1.64         |
| Yes, 1 <sup>st</sup> attendance at age 1-<3 year(s)              | 0.78                                                      | 0.57 – 1.07         | 1.00            | 0.64 – 1.57         |
| Yes, 1 <sup>st</sup> attendance at age <1 year                   | 0.77                                                      | 0.52 – 1.14         | 0.49            | 0.19 – 1.25         |
| <b>Weight at the age of 10 years compared to peers</b>           |                                                           |                     |                 |                     |
| Lower                                                            | 0.85                                                      | 0.67 – 1.08         | 1.00            | 0.69 – 1.43         |
| Average                                                          | <i>Ref.</i>                                               |                     | <i>Ref.</i>     |                     |
| Higher                                                           | 0.94                                                      | 0.70 – 1.25         | 1.31            | 0.88 – 1.96         |
| <b>BMI<sup>b</sup> at the age of 18 years (kg/m<sup>2</sup>)</b> |                                                           |                     |                 |                     |
| Underweight (<18.5)                                              | 0.96                                                      | 0.72 – 1.27         | 1.06            | 0.62 – 1.81         |
| Normal weight (18.5 - <25)                                       | <i>Ref.</i>                                               |                     | <i>Ref.</i>     |                     |
| Overweight (25 - <30)                                            | 1.55                                                      | 1.05 – 2.29         | 0.78            | 0.45 – 1.37         |
| Obesity (≥30)                                                    | 1.78                                                      | 0.96 – 3.30         | 1.45            | 0.66 – 3.17         |
| <b>Childhood Trauma<sup>c</sup> (per 5 units)</b>                | 1.11                                                      | 0.96 – 1.29         | 1.05            | 0.81 – 1.37         |

<sup>a</sup>Adjusted for education and migration status, stratified by birth year (categorized as: <1955, 1955-1964, 1965-1974, 1975-1984, ≥1985)

<sup>b</sup>HR = Hazard Ratio, CI = Confidence Interval, BMI = Body Mass Index

<sup>c</sup>Assessed with the Childhood Trauma Screener (5 – 25 points)
