# Supplementary material for: Childhood and adolescence factors and multiple sclerosis: results from the German National Cohort (NAKO)
Source: PubMed Central journal article supplement (PMC11015562; doi:10.1186/s12883-024-03620-4), 2024-04-13
Supplement: 12883_2024_3620_MOESM2_ESM.pdf [file 12883_2024_3620_MOESM2_ESM.pdf]

Supplementary Table S2: Multivariable Cox proportional hazards regression on the association between childhood and adolescence factors and multiple sclerosis – complete case analysis for the total sample and stratified by sex

| Variable                                                         | Multivariable Cox proportional Hazards Model <sup>a</sup><br>(n = 75247; 310 participants with and 74937 participants without an MS <sup>b</sup> diagnosis) |                     | Multivariable Cox proportional Hazards Model – Women <sup>a</sup><br>(n = 41296; 228 women with and 41068 women without an MS <sup>b</sup> diagnosis) |                     | Multivariable Cox proportional Hazards Model – Men <sup>a</sup><br>(n = 33951, 82 men with and 33869 men without an MS <sup>b</sup> diagnosis) |                     |
|------------------------------------------------------------------|-------------------------------------------------------------------------------------------------------------------------------------------------------------|---------------------|-------------------------------------------------------------------------------------------------------------------------------------------------------|---------------------|------------------------------------------------------------------------------------------------------------------------------------------------|---------------------|
|                                                                  | HR <sup>b</sup>                                                                                                                                             | 95% CI <sup>b</sup> | HR <sup>b</sup>                                                                                                                                       | 95% CI <sup>b</sup> | HR <sup>b</sup>                                                                                                                                | 95% CI <sup>b</sup> |
| <b>Sex</b>                                                       |                                                                                                                                                             |                     |                                                                                                                                                       |                     |                                                                                                                                                |                     |
| Female                                                           | <i>Ref.</i>                                                                                                                                                 |                     |                                                                                                                                                       |                     |                                                                                                                                                |                     |
| Male                                                             | 0.43                                                                                                                                                        | 0.33 – 0.56         |                                                                                                                                                       |                     |                                                                                                                                                |                     |
| <b>Number of siblings</b>                                        |                                                                                                                                                             |                     |                                                                                                                                                       |                     |                                                                                                                                                |                     |
| Only child                                                       | <i>Ref.</i>                                                                                                                                                 |                     | <i>Ref.</i>                                                                                                                                           |                     | <i>Ref.</i>                                                                                                                                    |                     |
| 1-2 sibling(s)                                                   | 1.16                                                                                                                                                        | 0.85 – 1.58         | 1.07                                                                                                                                                  | 0.75 – 1.53         | 1.47                                                                                                                                           | 0.75 – 2.89         |
| ≥3 siblings                                                      | 1.05                                                                                                                                                        | 0.70 – 1.57         | 1.10                                                                                                                                                  | 0.69 – 1.73         | 0.94                                                                                                                                           | 0.39 – 2.27         |
| <b>Premature birth (&gt;4 weeks before due date)</b>             |                                                                                                                                                             |                     |                                                                                                                                                       |                     |                                                                                                                                                |                     |
| No                                                               | <i>Ref.</i>                                                                                                                                                 |                     | <i>Ref.</i>                                                                                                                                           |                     | <i>Ref.</i>                                                                                                                                    |                     |
| Yes                                                              | 1.10                                                                                                                                                        | 0.62 – 1.96         | 0.95                                                                                                                                                  | 0.48 – 1.86         | 1.83                                                                                                                                           | 0.58 – 5.80         |
| <b>Cesarean section</b>                                          |                                                                                                                                                             |                     |                                                                                                                                                       |                     |                                                                                                                                                |                     |
| No                                                               | <i>Ref.</i>                                                                                                                                                 |                     | <i>Ref.</i>                                                                                                                                           |                     | <i>Ref.</i>                                                                                                                                    |                     |
| Yes                                                              | 1.23                                                                                                                                                        | 0.77 – 1.97         | 1.27                                                                                                                                                  | 0.73 – 2.21         | 1.14                                                                                                                                           | 0.48 – 2.68         |
| <b>Birth weight</b>                                              |                                                                                                                                                             |                     |                                                                                                                                                       |                     |                                                                                                                                                |                     |
| Low                                                              | 1.15                                                                                                                                                        | 0.80 – 1.65         | 1.24                                                                                                                                                  | 0.84 – 1.83         | 0.78                                                                                                                                           | 0.29 – 2.12         |
| Average                                                          | <i>Ref.</i>                                                                                                                                                 |                     | <i>Ref.</i>                                                                                                                                           |                     | <i>Ref.</i>                                                                                                                                    |                     |
| High                                                             | 1.06                                                                                                                                                        | 0.75 – 1.49         | 1.09                                                                                                                                                  | 0.72 – 1.67         | 0.99                                                                                                                                           | 0.56 – 1.75         |
| <b>Ever breastfed</b>                                            |                                                                                                                                                             |                     |                                                                                                                                                       |                     |                                                                                                                                                |                     |
| No                                                               | <i>Ref.</i>                                                                                                                                                 |                     | <i>Ref.</i>                                                                                                                                           |                     | <i>Ref.</i>                                                                                                                                    |                     |
| Yes, ≤4 months                                                   | 1.08                                                                                                                                                        | 0.82 – 1.43         | 1.25                                                                                                                                                  | 0.92 – 1.69         | 0.71                                                                                                                                           | 0.38 – 1.30         |
| Yes, >4 months                                                   | 0.99                                                                                                                                                        | 0.73 – 1.34         | 0.90                                                                                                                                                  | 0.63 – 1.30         | 1.06                                                                                                                                           | 0.58 – 1.91         |
| <b>Contact with pets and/or livestock during childhood</b>       |                                                                                                                                                             |                     |                                                                                                                                                       |                     |                                                                                                                                                |                     |
| No                                                               | <i>Ref.</i>                                                                                                                                                 |                     | <i>Ref.</i>                                                                                                                                           |                     | <i>Ref.</i>                                                                                                                                    |                     |
| Yes                                                              | 1.06                                                                                                                                                        | 0.85 – 1.33         | 1.00                                                                                                                                                  | 0.77 – 1.30         | 1.30                                                                                                                                           | 0.84 – 2.02         |
| <b>Attended daycare</b>                                          |                                                                                                                                                             |                     |                                                                                                                                                       |                     |                                                                                                                                                |                     |
| No                                                               | <i>Ref.</i>                                                                                                                                                 |                     | <i>Ref.</i>                                                                                                                                           |                     | <i>Ref.</i>                                                                                                                                    |                     |
| Yes, 1 <sup>st</sup> attendance at age 3-6 years                 | 0.91                                                                                                                                                        | 0.68 – 1.22         | 0.84                                                                                                                                                  | 0.60 – 1.19         | 1.13                                                                                                                                           | 0.63 – 2.03         |
| Yes, 1 <sup>st</sup> attendance at age 1-<3 year(s)              | 0.84                                                                                                                                                        | 0.57 – 1.25         | 0.89                                                                                                                                                  | 0.56 – 1.41         | 0.78                                                                                                                                           | 0.36 – 1.68         |
| Yes, 1 <sup>st</sup> attendance at age <1 year                   | 0.85                                                                                                                                                        | 0.52 – 1.38         | 0.97                                                                                                                                                  | 0.58 – 1.65         | 0.36                                                                                                                                           | 0.08 – 1.58         |
| <b>Weight at the age of 10 years compared to peers</b>           |                                                                                                                                                             |                     |                                                                                                                                                       |                     |                                                                                                                                                |                     |
| Lower                                                            | 0.89                                                                                                                                                        | 0.67 – 1.18         | 0.80                                                                                                                                                  | 0.56 – 1.13         | 1.13                                                                                                                                           | 0.67 – 1.92         |
| Average                                                          | <i>Ref.</i>                                                                                                                                                 |                     | <i>Ref.</i>                                                                                                                                           |                     | <i>Ref.</i>                                                                                                                                    |                     |
| Higher                                                           | 1.01                                                                                                                                                        | 0.73 – 1.40         | 0.95                                                                                                                                                  | 0.65 – 1.38         | 1.18                                                                                                                                           | 0.62 – 2.25         |
| <b>BMI<sup>b</sup> at the age of 18 years (kg/m<sup>2</sup>)</b> |                                                                                                                                                             |                     |                                                                                                                                                       |                     |                                                                                                                                                |                     |
| Underweight (<18.5)                                              | 1.23                                                                                                                                                        | 0.89 – 1.70         | 1.16                                                                                                                                                  | 0.81 – 1.66         | 2.09                                                                                                                                           | 1.01 – 4.33         |
| Normal weight (18.5 - <25)                                       | <i>Ref.</i>                                                                                                                                                 |                     | <i>Ref.</i>                                                                                                                                           |                     | <i>Ref.</i>                                                                                                                                    |                     |
| Overweight (25 - <30)                                            | 1.93                                                                                                                                                        | 1.35 – 2.75         | 2.37                                                                                                                                                  | 1.57 – 3.58         | 1.21                                                                                                                                           | 0.60 – 2.45         |
| Obesity (≥30)                                                    | 3.02                                                                                                                                                        | 1.70 – 5.39         | 2.91                                                                                                                                                  | 1.42 – 5.93         | 3.41                                                                                                                                           | 1.26 – 9.24         |
| <b>Childhood Trauma<sup>c</sup> (per 5 units)</b>                | 0.94                                                                                                                                                        | 0.75 – 1.18         | 0.91                                                                                                                                                  | 0.70 – 1.18         | 1.05                                                                                                                                           | 0.65 – 1.70         |

---

<sup>a</sup>Adjusted for education and migration status, stratified by birth year (categorized as: <1955, 1955-1964, 1965-1974, 1975-1984,  $\geq$ 1985)

---

<sup>b</sup>MS = Multiple Sclerosis, HR = Hazard Ratio, CI = Confidence Interval, BMI = Body Mass Index

---

<sup>c</sup>Assessed with the Childhood Trauma Screener (5 – 25 points)

---
