# Supplementary material for: Childhood and adolescence factors and multiple sclerosis: results from the German National Cohort (NAKO)
Source: PubMed Central journal article supplement (PMC11015562; doi:10.1186/s12883-024-03620-4), 2024-04-13

Supplementary Figure S3: Forest Plot: Multivariable Cox proportional hazards regression on the association between childhood and adolescence factors and multiple sclerosis – Imputation model and complete case analysis

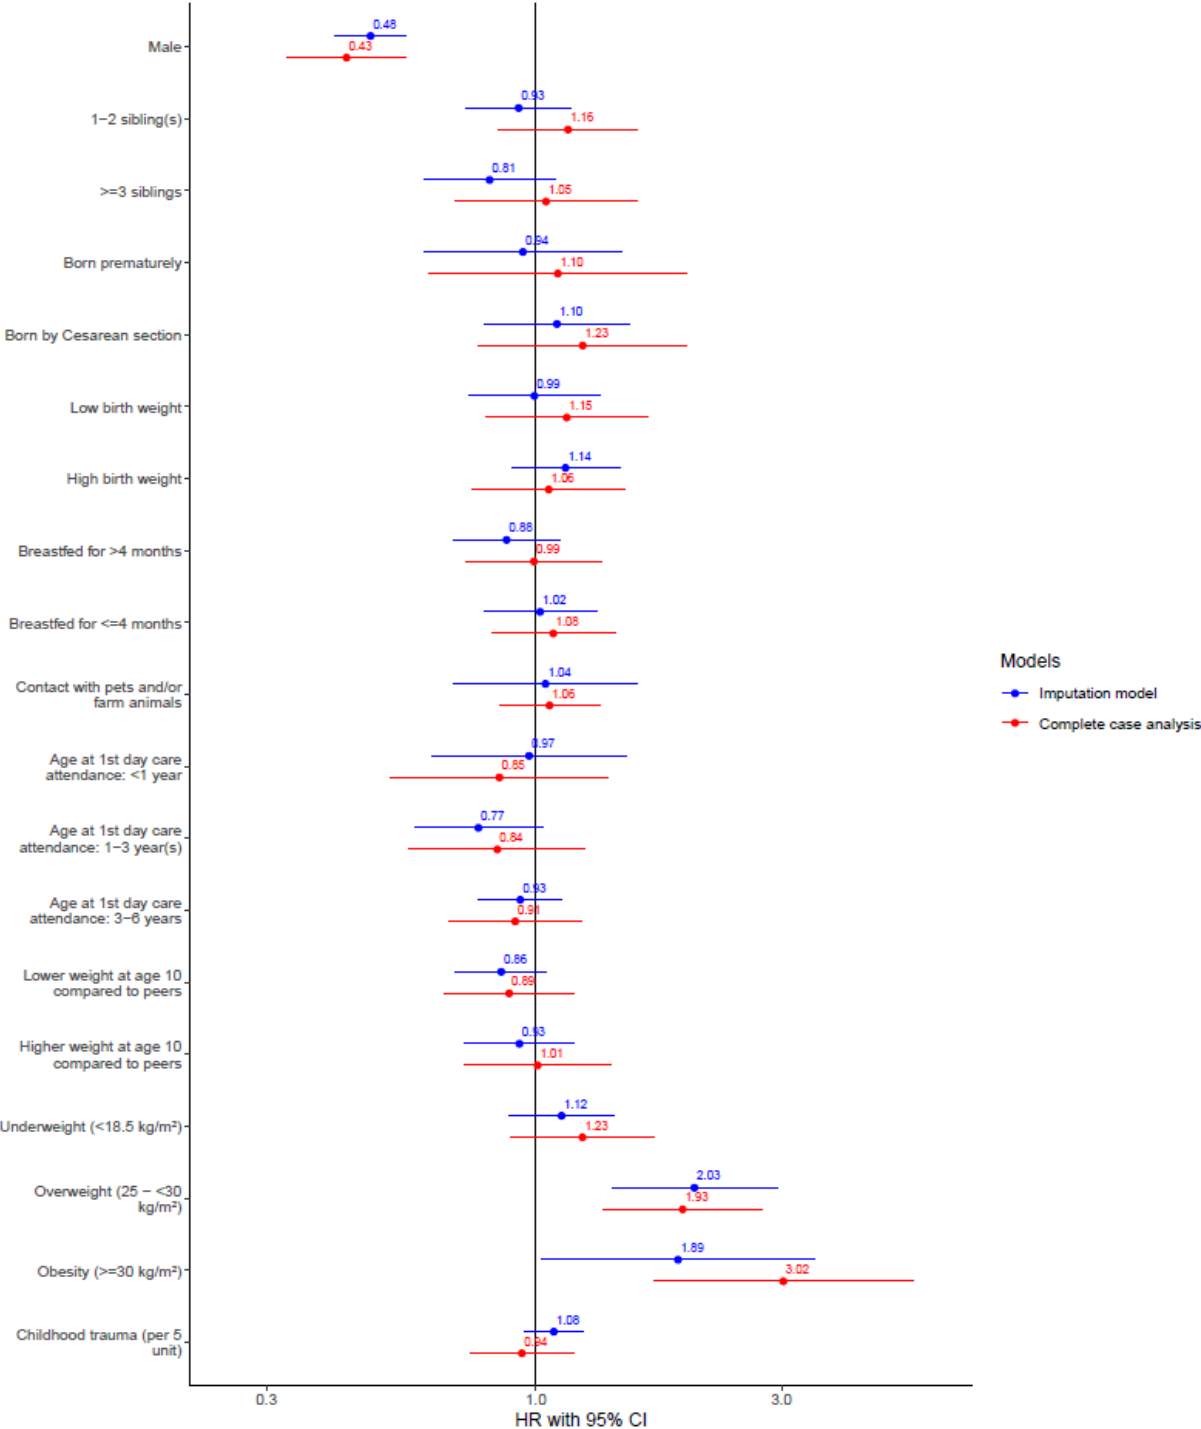

Supplement: 12883_2024_3620_MOESM3_ESM.pdf [file 12883_2024_3620_MOESM3_ESM.pdf]
